# Supplementary material for: LncRNA TRERNA1 Function as an Enhancer of SNAI1 Promotes Gastric Cancer Metastasis by Regulating Epithelial-Mesenchymal Transition
Source: PubMed Central journal article supplement — Mol Ther Nucleic Acids. 2017 Jul 3;8:291–9. doi: 10.1016/j.omtn.2017.06.021 (PMC5537167; doi:10.1016/j.omtn.2017.06.021), 2017-07-03
Supplement: mmc1.pdf [file mmc1.pdf]

OMTN, Volume 8

## Supplemental Information

### **LncRNA *TRERNA1* Function as an Enhancer of *SNAI1* Promotes Gastric Cancer Metastasis by Regulating Epithelial-Mesenchymal Transition**

**Huazhang Wu, Ying Hu, Xiufang Liu, Wei Song, Pihai Gong, Kun Zhang, Zhenxing Chen, Menghan Zhou, Xiaohui Shen, Yanyan Qian, and Hong Fan**

**Table S1 qRT-PCR primers for genes adjacent to TRERNA1**

| Gene    | Sense (5'→3')            | Antisense (5'→3')          | Reference |
|---------|--------------------------|----------------------------|-----------|
| β-actin | AGAAGGCTGG GGCTCATTTG    | AGGGGCCATCCACAGTCTTC       |           |
| TRERNA1 | CCGTTGGCTCCACAAACCT      | CAGTGACAGTAGCAGGCATCCT     | [28]      |
| TMEM189 | GCTTCGTCTTCTGCCTGATCA    | AAAGTACGTGTGCGACCACTTG     | [28]      |
| UBE2V1  | AAGCAAGAGCGACGCAAGAT     | CGGAAATTGCGAGGGACTT        | [28]      |
| RNF114  | GCAGCGCCAACTTCAGAGA      | CATCAACATCATAATCCACAAAAGTG | [28]      |
| CEBPB F | AACCAACCGCACATGCAGAT     | GGCAGAGGGAGAAGCAGAGAGT     |           |
| SNAI1   | TTCAACTGCAAATACTGCAACAAG | TGTGGCTTCGGATGTGCAT        | [28]      |
| GAPDH   | AGCCACATCGCTCAGACA       | GCCCAATACGACCAAATCC        |           |
| U6      | CTCGCTTCGGCAGCACA        | AACGCTTCACGAATTTGCGT       |           |

**Table S2 The primers used for the amplification of CDH1 promoter DNA fragments**

| Site | Primers   | Sequence (5'→3')       |
|------|-----------|------------------------|
| 1    | Sense     | TGTCCGCCCCGACTTGTCTCTC |
|      | Antisense | GTCCTCTGGCCCCAGCCTCTCT |
| 2    | Sense     | GCTACTAGAGAGGCTGGGGC   |
|      | Antisense | TTGTTTCGTTTTGGAGATGGG  |
| 3    | Sense     | ACAAAAAATCCCAAAAAACA   |
|      | Antisense | CATAGACGCGGTGACCCTCT   |
| 4    | Sense     | TAGAGGGTCACCGGTCTAT    |
|      | Antisense | TCACAGGTGCTTTGCAGTTC   |
